# Supplementary material for: Failure of Diphtheria Toxin Model to Induce Parkinson-Like Behavior in Mice
Source: MDPI journal article supplement (doi:10.3390/ijms22179496), 2021-08-31
Supplement: s1 [file s1]

## Supplementary Tables and Supplementary Figures

**Suppl. Table S1 (T-S1)**

| Genotype | Mice # | Dose DTx                             | Doses | Dead/Alive |
|----------|--------|--------------------------------------|-------|------------|
| DTR-flfl | 2      | 50 ng/g                              | 1     | 2/0        |
|          | 1      | 25 ng/g                              | 1     | 1/0        |
|          | 1      | 12.5 ng/g                            | 1     | 1/0        |
|          | 1      | 6.25 ng/g                            | 1     | 1/0        |
|          | 1      | 3.1 ng/g                             | 1     | 1/0        |
|          | 1      | 1.5 ng/g                             | 1     | 1/0        |
|          | 6      | 100 ng per mouse ( $\approx$ 4 ng/g) | 5     | 4/2        |
|          | 4      | 50 ng per mouse ( $\approx$ 2 ng/g)  | 2     | 2/2        |
|          | 9      | 100 pg/g                             | 5     | 0/9        |
| DAT-DTR  | 2      | 50 ng/g                              | 1     | 2/0        |
|          | -      | 25 ng/g                              | 1     | 1/0        |
|          | 1      | 12.5 ng/g                            | 1     | 1/0        |
|          | 1      | 6.25 ng/g                            | 1     | 1/0        |
|          | 1      | 3.1 ng/g                             | 1     | 1/0        |
|          | 1      | 1.5 ng/g                             | 1     | 1/0        |
|          | 8      | 100 ng per mouse ( $\approx$ 4 ng/g) | 5     | 4/4        |
|          | 4      | 50 ng per mouse ( $\approx$ 2 ng/g)  | 2     | 3/1        |
|          | 11     | 100 pg/g                             | 5     | 0/11       |

**Suppl. Table S1:** DTx dose finding studies. DTx was injected i.p. as a single dose or on consecutive days as indicated. DTx was diluted in 0.9% saline.

**Suppl. Table S2 (T-S2)**

| Sample                   | Abs. 540 nm | Abs. minus Blank | Endotoxin (EU/ml) | Sample       | Abs 540 nm | Abs. minus Blank | Endotoxin (EU/ml) |
|--------------------------|-------------|------------------|-------------------|--------------|------------|------------------|-------------------|
| Assay water              | 0.0606      | 0                |                   | Assay water  | 0.0608     | 0                |                   |
| 0.1 EU/ml                | 0.1137      | 0.0531           |                   | 0.01 EU/ml   | 0.097      | 0.0362           |                   |
| 0.25 EU/ml               | 0.3564      | 0.2958           |                   | 0.025 EU/ml  | 0.1971     | 0.1363           |                   |
| 0.5 EU/ml                | 0.9243      | 0.8637           |                   | 0.05 EU/ml   | 0.332      | 0.2712           |                   |
| 1.0 EU/ml                | 1.5971      | 1.5365           |                   | 0.1 EU/ml    | 0.6342     | 0.5734           |                   |
| DTx stock 0.1 mg/ml      | 1.7493      | 1.6887           | 1.0649            | NaCl         | 0.1114     | 0.0506           | 0.0201            |
| DTx 1.5 ng/g (750 ng/ml) | 0.067       | 0.0064           | 0.0529            | DTx 1.5 ng/g | 0.1798     | 0.119            | 0.0183            |
| DTx 100 pg/g (50 ng/ml)  | 0.0675      | 0.0069           | 0.0532            | DTx 100 pg/g | 0.1011     | 0.0403           | 0.0319            |

**Suppl. Table S2:** Endotoxin ELISA experiments of the stock solution of commercial DTx and at dilutions used for in vivo experiments. The stock solution was 0.1 mg/ml DTx in sterile water, and was further diluted in 0.9% saline 1:100-1:2000 as working solutions used for injections in mice.

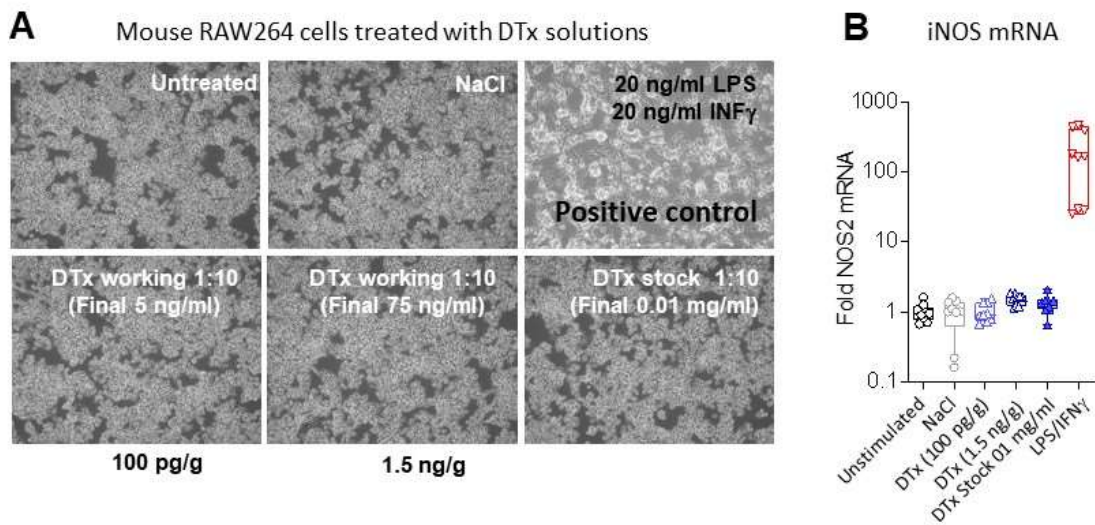

**Suppl. Figure S1**

Effects of diphtheria toxin (DTx) from *Corynebacterium diphtheria* in mouse macrophages. DTx is supposed to be non-toxic in rodents and rodents' cells.

**A:** Morphology of mouse RAW264.7 macrophages in vitro. DTx stock and working solutions had no effect on the viability and morphology of the cells. LPS/IFN $\gamma$  was used as positive control.

**B:** Quantitative RT-PCR of inducible nitric oxide synthase (iNOS). iNOS mRNA increased 100fold upon LPS/IFN $\gamma$  stimulation (positive control) but stimulation with DTX stock or working solutions had no effect.
